# Supplementary material for: Targeting a viral macrodomain: Design, Structure-Based Optimization and Antiviral Evaluation of Nanomolar Inhibitors for Mac1 of SARS-CoV-2
Source: Research Square preprint supplement (doi:10.21203/rs.3.rs-7063434/v1), 2025-08-08
Supplement: Supplementary file 1 [file 85f7ff6e69e413f976d9f2de.pdf]

**Table 1: Compound ID in this study.**

| ID | Compound (full name)                                                   | Abbreviation(s)                                                            |
|----|------------------------------------------------------------------------|----------------------------------------------------------------------------|
| 1  | Adenosine 5'-O-diphosphoribose                                         | ADPR                                                                       |
| 2  | $\beta$ -Nicotinamide adenine dinucleotide                             | $\beta$ -NAD                                                               |
| 3  | GS-441524                                                              | GS-441524                                                                  |
| 4  | $\beta$ -methyl-GS-441524 diphosphate                                  | $\beta$ -methyl-GS-441524 diphosphate                                      |
| 5  | C <sub>11</sub> -acyloxybenzyl- $\beta$ -methyl-GS-441524 diphosphate  | ST135, C <sub>11</sub> -AB- $\beta$ -methyl-GS-441524 diphosphate          |
| 6  | $\beta$ -(Dodecanoyloxybenzyl)-(ethyl)-GS-441524 phosphate phosphonate | ST166, C <sub>11</sub> -AB- $\beta$ -ethyl-GS-441524 phosphate phosphonate |
| 7  | $\alpha$ -Nicotinamide adenine dinucleotide                            | $\alpha$ -NAD                                                              |
| 8  | Nicotinamide                                                           | Nicotinamide, NicAmide                                                     |
| 9  | 1,N <sup>6</sup> -ethenoadenosine-5'-O-diphosphoribose                 | 1,N <sup>6</sup> -etheno-ADPR                                              |
| 10 | Inosine-5'-O-diphosphoribose                                           | IDPR                                                                       |
| 11 | 2-Fluoroadenosine 5'-O-diphosphoribose                                 | 2F-ADPR                                                                    |
| 12 | 8-Thiophen-3-yl-adenosine 5'-O-diphosphoribose                         | 8-thiophen-3-yl-ADPR                                                       |
| 13 | 8-Bromoadenosine 5'-O-diphosphoribose                                  | 8-Br-ADPR                                                                  |
| 14 | 8-Bromo-7-deazaadenosine 5'-O-diphosphoribose                          | 8-Br-7-deaza-ADPR                                                          |
| 15 | 2'-Phosphoadenosine 5'-O-diphosphoribose                               | 2'-phospho-ADPR, ADPRP                                                     |
| 16 | 2'-Deoxyadenosine 5'-O-diphosphoribose                                 | 2'-deoxy-ADPR                                                              |
| 17 | 2'-Fluoro-2'-deoxyadenosine 5'-O-diphosphoribose                       | 2'-F-2'-deoxy-ADPR                                                         |
| 18 | Adenosine 5'-O-diphosphate                                             | ADP                                                                        |
| 19 | 2'-Deoxyadenosine 5'-O-diphosphate                                     | 2'-deoxy-ADP                                                               |
| 20 | 7-Deazaadenosine 5'-O-diphosphate                                      | 7-deaza-ADP                                                                |
| 21 | 7-Deaza-2'-deoxyadenosine 5'-O-diphosphate                             | 7-deaza-2'-deoxy-ADP                                                       |
| 22 | 7-Deazaadenosine diphosphate ribose                                    | 7-deaza-ADPR                                                               |
| 23 | Adenosine 5'-O-diphosphoglucose                                        | ADP-glucose                                                                |
| 24 | 3'',2'-Dideoxyadenosine 5'-O-diphosphoribose                           | 3'',2'-Dideoxy-ADPR                                                        |
| 25 | 1'',2'-Dideoxyadenosine 5'-O-diphosphoribose                           | 1'',2'-dideoxy-ADPR                                                        |
| 26 | Tetrahydrofurfuryl-adenosine 5'-O-diphosphate                          | THF-ADP                                                                    |
| 27 | Cyclopentyl-adenosine 5'-O-diphosphate                                 | Cyclopentyl-ADP                                                            |
| 28 | $\beta$ -Ethyl-adenosine 5'-O-diphosphate                              | $\beta$ -ethyl-ADP                                                         |
| 29 | $\beta$ -Methyl-adenosine 5'-O-diphosphate                             | $\beta$ -methyl-ADP                                                        |
| 30 | 5-ribosyl-squaryl-adenosine                                            | /                                                                          |
| 31 | Adenosine-5'-O-(2-phosphoryl)acetate ribose                            | A-acetyl-PR                                                                |
| 32 | Adenosine-5'-phosphonoacetyl-ribose                                    | AMP-acetyl-R                                                               |
| 33 | $\alpha$ - $\beta$ methylene-adenosine 5'-O-diphosphoribose            | AMPcPR                                                                     |
| 34 | $\alpha$ - $\beta$ methylene-adenosine 5'-O-diphosphate                | AMPcP                                                                      |
| 35 | Adenosine-5'-O-(2-thiodiphosphate)                                     | ADP- $\beta$ -S                                                            |
| 36 | (Rp)-adenosine 5'-(1-thiodiphosphate)                                  | Rp-ADP- $\alpha$ -S                                                        |
| 37 | (Sp)-adenosine 5'-(1-thiodiphosphate)                                  | Sp-ADP- $\alpha$ -S                                                        |
| 38 | Adenosine                                                              | /                                                                          |
| 39 | Adenosine 5'-O-monophosphate                                           | AMP                                                                        |

|    |                                                                                                                                                    |              |
|----|----------------------------------------------------------------------------------------------------------------------------------------------------|--------------|
| 40 | GS-441524-monophosphate                                                                                                                            | GS-441524 MP |
| 41 | GS-441524-diphosphate                                                                                                                              | GS-441524 DP |
| 42 | $\beta$ -ethyl-GS-441524-phosphate-phosphonate                                                                                                     | ST161        |
| 43 | GS-441524 triphosphate                                                                                                                             | /            |
| 44 | $\beta$ -Nicotinamide mononucleotide                                                                                                               | $\beta$ -NMN |
| 45 | Dibenzylmethyl phosphate                                                                                                                           | /            |
| 46 | Methyl phosphate                                                                                                                                   | /            |
| 47 | 4-(Hydroxymethyl)phenyldodecanoate                                                                                                                 | /            |
| 48 | 4-Dodecanoyloxybenzyl-methyl- <i>H</i> -phosphonate                                                                                                | /            |
| 49 | Ethylphosphonate                                                                                                                                   | /            |
| 50 | 4-Dodecanoyloxybenzyl)-ethyl phosphonate                                                                                                           | /            |
| 51 | Bis- <i>O</i> -(9H-fluoren-9-ylmethyl- <i>N,N</i> -diisopropylamino phosphoramidite                                                                | Fm amidite   |
| 52 | 5- <i>O</i> -Trityl-D-ribo-1,4-lactone                                                                                                             | /            |
| 53 | 2,3-Bis- <i>O</i> -tert-Butyldimethylsilyl-5- <i>O</i> -trityl-D-ribo-1,4-lactone                                                                  | /            |
| 54 | 2',3'-Bis- <i>O</i> -tert-Butyldimethylsilyl-5'- <i>O</i> -trityl-D-ribose                                                                         | /            |
| 55 | 2',3'-Bis- <i>O</i> -tert-butyldimethylsilyl-1'- <i>O</i> -tert-butyldiphenylsilyl-5'- <i>O</i> -trityl-D-ribose                                   | /            |
| 56 | 2',3'-Bis- <i>O</i> -tert-butyldimethylsilyl-1'- <i>O</i> -tert-butyldiphenylsilyl-D-ribose                                                        | /            |
| 57 | Bis- <i>O</i> -(9H-fluoren-9-ylmethyl-2',3'-bis- <i>O</i> -tert-butyldimethylsilyl-1'- <i>O</i> -tert-butyldiphenylsilyl-D-ribose-5'-monophosphate | /            |
| 58 | 2',3'-Bis- <i>O</i> -tert-butyldimethylsilyl-1'- <i>O</i> -tert-butyldiphenylsilyl-D-ribose-5'-monophosphate                                       | /            |
| 59 | 7-Deazaadenosine diphosphate-2',3'-bis- <i>O</i> -tert-butyldimethylsilyl-1'- <i>O</i> -tert-butyldiphenylsilyl ribose                             | /            |
| 60 | Dibenzylethyl phosphate                                                                                                                            | /            |
| 61 | Ethyl phosphate                                                                                                                                    | /            |

**Table 2: Summary of IC<sub>50</sub> and K<sub>D</sub> values.**

| Figure         | ID | Compound                              | Macro-domain | activity assay    |                       | binding assay |                     |
|----------------|----|---------------------------------------|--------------|-------------------|-----------------------|---------------|---------------------|
|                |    |                                       |              | type <sup>§</sup> | IC <sub>50</sub> (μM) | type*         | K <sub>D</sub> (μM) |
| 1              | 1  | ADPR                                  | Mac1 WT      | P                 | 28                    | /             | /                   |
|                | 10 | IDPR                                  | Mac1 WT      | P                 | >400                  | /             | /                   |
|                | 9  | 1, <i>N</i> <sup>6</sup> -etheno-ADPR | Mac1 WT      | P                 | >200                  | /             | /                   |
|                | 11 | 2-F-ADPR                              | Mac1 WT      | P                 | 191                   | /             | /                   |
|                | 13 | 8-Br-ADPR                             | Mac1 WT      | P                 | 48                    | M             | 14.7                |
|                |    |                                       |              | H                 | 41                    |               |                     |
|                | 12 | 8-thiophen-3-yl-ADPR                  | Mac1 WT      | H                 | 254                   | /             | /                   |
|                | 14 | 8-Br-7-deaza-ADPR                     | Mac1 WT      | P                 | 38                    | M             | 9                   |
| 2              | 22 | 7-deaza-ADPR                          | Mac1 WT      | P                 | 15                    | /             | /                   |
|                | 1  | ADPR                                  | Mac1 WT      | P                 | 25                    | /             | /                   |
|                | 15 | ADPRP                                 | Mac1 WT      | P                 | 37                    | M             | 35.2                |
|                | 16 | 2'-deoxy-ADPR                         | Mac1 WT      | P                 | 40                    | M             | 12.6                |
| 3              | 17 | 2'-F-2'-deoxy-ADPR                    | Mac1 WT      | P                 | 49                    | M             | 20.3                |
|                | 1  | ADPR                                  | Mac1 WT      | P                 | 24                    | /             | /                   |
|                | 23 | ADP-glucose                           | Mac1 WT      | P                 | >120                  | /             | /                   |
|                | 16 | 2'-deoxy-ADPR                         | Mac1 WT      | P                 | 40                    | /             | /                   |
|                | 25 | 1'',2'-dideoxy-ADPR                   | Mac1 WT      | P                 | 149                   | /             | /                   |
|                | 24 | 3'',2'-dideoxy-ADPR                   | Mac1 WT      | P                 | 111                   | /             | /                   |
|                | 26 | THF-ADP                               | Mac1 WT      | P                 | 260                   | /             | /                   |
|                | 27 | Cyclopentyl-ADP                       | Mac1 WT      | P                 | 1614                  | /             | /                   |
|                | 29 | β-methyl-ADP                          | Mac1 WT      | P                 | 13                    | M             | 6.7                 |
| 4a             | 28 | β-ethyl-ADP                           | Mac1 WT      | P                 | 40                    | M             | 19.9                |
|                | 1  | ADPR                                  | Mac1 WT      | P                 | 28                    | /             | /                   |
|                | 39 | AMP                                   | Mac1 WT      | P                 | >2000                 | /             | /                   |
|                | 38 | Adenosine                             | Mac1 WT      | P                 | >400                  | /             | /                   |
|                | 3  | GS-441524                             | Mac1 WT      | P                 | 73                    | /             | /                   |
|                | 40 | GS-441524 monophosphate               | Mac1 WT      | P                 | 44                    | /             | /                   |
| 4b-f, 5d       | 41 | GS-441524 diphosphate                 | Mac1 WT      | P                 | 26                    | M             | 10.91               |
|                | 1  | ADPR                                  | Mac1 WT      | P                 | 23                    | /             | /                   |
|                | 13 | 8-Br-ADPR                             | MacroD1      | P                 | 19                    | /             | /                   |
|                |    |                                       | MacroD2      |                   | 32                    | /             | /                   |
|                | 4  | β-methyl-GS-441524 diphosphate        | Mac1 WT      | P                 | 0.24                  | M             | 0.17                |
|                |    |                                       | MacroD1      |                   | >240                  | /             | /                   |
|                |    |                                       | MacroD2      |                   | >240                  | /             | /                   |
| 7 <sup>§</sup> | 42 | ST161                                 | Mac1 WT      | P                 | 1.54                  | Q             | 0.86                |
|                | 1  | ADPR                                  | Mac1 WT      | P                 | 22                    | /             | /                   |
|                | 18 | ADP                                   | Mac1 WT      | P                 | 3656                  | /             | /                   |
|                | 20 | 7-deaza-ADP                           | Mac1 WT      | P                 | 1208                  | /             | /                   |
|                | 19 | 2'-deoxy-ADP                          | Mac1 WT      | P                 | 5834                  | /             | /                   |
| 7 <sup>§</sup> | 21 | 7-deaza-2'-deoxy-ADP                  | Mac1 WT      | P                 | 2667                  | /             | /                   |

|                 |    |                             |                |   |       |   |     |
|-----------------|----|-----------------------------|----------------|---|-------|---|-----|
| 9 <sup>§</sup>  | 1  | ADPR                        | Mac1 Phe132Ala | / | /     | Q | 4.9 |
|                 | 29 | β-methyl-ADP                | Mac1 Phe132Ala | / | /     | Q | 3.3 |
|                 | 28 | β-ethyl-ADP                 | Mac1 Phe132Ala | / | /     | Q | 2.9 |
| 10 <sup>§</sup> | 1  | ADPR                        | Mac1 WT        | P | 22    | / | /   |
|                 | 13 | 8-Br-ADPR                   | Mac1 WT        | H | 45    | / | /   |
|                 | 30 | 5-Ribosyl-squaryl-adenosine | Mac1 WT        | H | >400  | / | /   |
|                 | 32 | AMP-acetyl-R                | Mac1 WT        | H | >400  | / | /   |
|                 | 31 | A-acetyl-PR                 | Mac1 WT        | H | >400  | / | /   |
|                 | 33 | AMPcPR                      | Mac1 WT        | H | >300  | / | /   |
|                 | 18 | ADP                         | Mac1 WT        | P | 3828  | / | /   |
|                 | 34 | AMPcP                       | Mac1 WT        | P | >4000 | / | /   |
|                 | 35 | ADP-β-S                     | Mac1 WT        | P | 3926  | / | /   |
|                 | 36 | Rp-ADP-α-S                  | Mac1 WT        | P | 2576  | / | /   |
|                 | 37 | Sp-ADP-α-S                  | Mac1 WT        | P | 1770  | / | /   |

<sup>§</sup>Supplementary Fig.

<sup>§</sup>P = plate, H = HPLC

\*M = MicroCal iTC200, Q = PEAQ ITC

**Table 3: Crystal data collection and structure refinement statistics.**

|                    |                               |                             |                                    |                                         |                             |                                  |                                       |                                                           |                               |
|--------------------|-------------------------------|-----------------------------|------------------------------------|-----------------------------------------|-----------------------------|----------------------------------|---------------------------------------|-----------------------------------------------------------|-------------------------------|
|                    | apo                           | ADPR<br><b>1</b>            | 2'-<br>deoxy-<br>ADPR<br><b>16</b> | 2'deoxy-<br>y-2'F-<br>ADPR<br><b>17</b> | 8-Br-<br>ADPR<br><b>13</b>  | $\beta$ -ethyl-<br>ADP <b>28</b> | $\beta$ -<br>methyl-<br>ADP <b>29</b> | $\beta$ -methyl-<br>GS-441524-<br>diphosphate<br><b>4</b> | ST161 <b>42</b>               |
| PDB code           | 8AZC                          | 8AZD                        | 8AZI                               | 8AZL                                    | 8AZM                        | 8AZO                             | 8AZP                                  | 9RHO                                                      | 9RHN                          |
| Wave-length        | 0.799                         | 0.976                       | 0.976                              | 0.976                                   | 0.976                       | 0.976                            | 0.976                                 | 0.976                                                     | 0.976                         |
| Resolution range   | 26.47 - 0.93<br>(0.96 - 0.93) | 48.35 - 2.0<br>(2.07 - 2.0) | 41.38 - 1.9<br>(1.97 - 1.9)        | 48.14 - 2.2<br>(2.28 - 2.2)             | 46.51 - 2.1<br>(2.18 - 2.1) | 40.77 - 1.9<br>(1.97 - 1.9)      | 48.35 - 1.6<br>(1.66 - 1.6)           | 35.85 - 1.6<br>(1.66 - 1.6)                               | 36.16 - 1.95<br>(2.02 - 1.95) |
| Space group        | C 1 2 1                       | P 21 21 21                  | P 21 21 21                         | P 21 21 21                              | P 21 21 21                  | P 21 21 21                       | P 21 21 21                            | P 31                                                      | P 31                          |
| Unit cell          | 129.8 30.2 39.5 90 96.8 90    | 59.5 76.0 82.9 90 90 90     | 59.4 74.8 82.8 90 90 90            | 59.3 74.6 82.6 90 90 90                 | 59.4 74.8 82.8 90 90 90     | 59.6 75.6 82.9 90 90 90          | 59.5 75.1 82.8 90 90 90               | 82.8 82.8 41.3 90 90 120                                  | 83.5 83.5 41.4 90 90 120      |
| Total reflections  | 2007 07 (1696 5)              | 8646 77 (2592 9)            | 383124 (38782)                     | 246162 (24483)                          | 284246 (26031)              | 324542 (23783)                   | 646750 (57685)                        | 429669 (45349)                                            | 460999 (46702)                |
| Unique reflections | 1008 21 (8769 )               | 2604 2 (2553 )              | 29698 (2925)                       | 19152 (1888)                            | 22133 (2185)                | 29803 (2892)                     | 49126 (4759)                          | 41759 (4194)                                              | 23526 (2344)                  |
| Multiplicity       | 2.0 (1.9)                     | 33.1 (13.6)                 | 12.9 (13.3)                        | 12.9 (13.0)                             | 12.8 (11.9)                 | 10.9 (8.2)                       | 13.2 (12.1)                           | 10.3 (10.8)                                               | 19.6 (19.9)                   |
| Completeness (%)   | 98.57 (86.1 2)                | 99.39 (99.1 8)              | 99.25 (99.22)                      | 99.11 (99.00)                           | 99.52 (99.54)               | 98.34 (97.50)                    | 98.64 (97.38)                         | 99.99 (100.00)                                            | 99.85 (100.00)                |
| Mean I/sigma(I)    | 15.51 (3.37)                  | 9.2 (1.7)                   | 9.84 (1.71)                        | 6.48 (1.51)                             | 9.70 (1.92)                 | 8.52 (1.97)                      | 17.03 (3.17)                          | 24.86 (7.78)                                              | 17.02 (3.26)                  |
| Wilson B-factor    | 6.39                          | 27.71                       | 29.00                              | 34.24                                   | 30.54                       | 23.30                            | 19.62                                 | 18.21                                                     | 20.86                         |
| R-merge            | 0.024 (0.17 7)                | 1.02 (1.44)                 | 0.13 (1.45)                        | 0.23 (1.38)                             | 0.196 (1.46)                | 0.164 (1.17)                     | 0.074 (0.803)                         | 0.066 (0.277)                                             | 0.193 (1.086)                 |
| R-meas             | 0.034 (0.25 0)                | 1.044 (1.55 4)              | 0.141 (1.51)                       | 0.237 (1.44)                            | 0.204 (1.525)               | 0.172 (1.249)                    | 0.077 (0.838)                         | 0.069 (0.290)                                             | 0.198 (1.115)                 |

|                                |                  |                  |                   |                  |                  |                   |                  |                  |                  |
|--------------------------------|------------------|------------------|-------------------|------------------|------------------|-------------------|------------------|------------------|------------------|
| R-pim                          | 0.023<br>(0.177) | 0.233<br>(0.581) | 0.0389<br>(0.413) | 0.066<br>(0.395) | 0.057<br>(0.439) | 0.0498<br>(0.421) | 0.021<br>(0.238) | 0.022<br>(0.088) | 0.045<br>(0.249) |
| CC1/2                          | 0.999<br>(0.917) | 0.983<br>(0.915) | 0.999<br>(0.899)  | 0.998<br>(0.933) | 0.998<br>(0.871) | 0.997<br>(0.828)  | 0.999<br>(0.948) | 0.999 (0.97)     | 0.998<br>(0.869) |
| Reflections used in refinement | 100821<br>(8767) | 26042<br>(2534)  | 29698<br>(2908)   | 19152<br>(1872)  | 22133<br>(2178)  | 29803<br>(2888)   | 49126<br>(4749)  | 41756<br>(4194)  | 23522<br>(2344)  |
| Reflections used for R-free    | 5037<br>(438)    | 1208<br>(105)    | 1437<br>(140)     | 918<br>(88)      | 1111<br>(97)     | 1447<br>(134)     | 2394<br>(225)    | 2023 (197)       | 1107<br>(114)    |
| R-work                         | 0.141<br>(0.172) | 0.206<br>(0.315) | 0.216<br>(0.376)  | 0.216<br>(0.299) | 0.219<br>(0.324) | 0.189<br>(0.265)  | 0.183<br>(0.239) | 0.171<br>(0.145) | 0.185<br>(0.252) |
| R-free                         | 0.151<br>(0.180) | 0.250<br>(0.373) | 0.258<br>(0.399)  | 0.264<br>(0.409) | 0.279<br>(0.345) | 0.232<br>(0.311)  | 0.206<br>(0.281) | 0.196<br>(0.183) | 0.215<br>(0.277) |
| Number of non-hydrogen atoms   | 1633             | 2893             | 2832              | 2774             | 2848             | 3001              | 2999             | 3005             | 2973             |
| Macro-molecules                | 1307             | 2608             | 2608              | 2608             | 2599             | 2599              | 2608             | 2579             | 2579             |
| ligands                        | 28               | 72               | 70                | 72               | 74               | 58                | 56               | 60               | 60               |
| solvent                        | 312              | 213              | 154               | 94               | 175              | 344               | 335              | 366              | 334              |
| Protein residues               | 169              | 344              | 344               | 344              | 343              | 343               | 344              | 338              | 338              |
| RMS (bonds)                    | 0.008            | 0.007            | 0.023             | 0.007            | 0.007            | 0.167             | 0.027            | 0.008            | 0.008            |
| RMS (angles)                   | 1.50             | 0.83             | 0.95              | 0.95             | 0.89             | 3.22              | 0.87             | 1.18             | 1.11             |
| Ramachandran favored (%)       | 98.80            | 97.65            | 97.35             | 98.82            | 97.35            | 97.35             | 98.53            | 99.40            | 99.10            |
| Ramachandran allowed (%)       | 1.20             | 2.35             | 2.65              | 0.88             | 2.65             | 2.65              | 1.47             | 0.60             | 0.90             |

|                                      |       |       |       |       |       |       |       |       |       |
|--------------------------------------|-------|-------|-------|-------|-------|-------|-------|-------|-------|
| Ramachan-<br>dran<br>outliers<br>(%) | 0.00  | 0.00  | 0.00  | 0.29  | 0.00  | 0.00  | 0.00  | 0.00  | 0.00  |
| Rotamer<br>outliers<br>(%)           | 0.00  | 0.00  | 0.00  | 0.00  | 0.00  | 0.00  | 0.00  | 0.35  | 0.00  |
| Clashscore                           | 3.40  | 8.10  | 16.78 | 14.89 | 14.36 | 10.04 | 4.91  | 1.91  | 2.10  |
| Average B-<br>factor                 | 10.23 | 31.66 | 36.24 | 39.48 | 36.74 | 26.24 | 24.54 | 24.31 | 25.18 |
| Macro-<br>molecules                  | 8.60  | 31.18 | 36.01 | 39.50 | 36.34 | 25.29 | 23.38 | 23.10 | 24.81 |
| ligands                              | 10.50 | 29.02 | 34.37 | 37.88 | 39.60 | 21.86 | 19.30 | 15.01 | 18.64 |
| solvent                              | 17.08 | 38.38 | 40.94 | 40.37 | 41.33 | 34.14 | 34.46 | 34.33 | 29.19 |

**Table 4: Primers for construction of recombinant SARS-CoV-2.**

| Primer name        | sequence (5'-3')                                        | fragment           |
|--------------------|---------------------------------------------------------|--------------------|
| gg_1_fwd           | GGCTACGGTCTCGTCCCAGGTAACAAACCAACCAACTTTTCG              | golden gate 1      |
| gg_1_rev           | GGCTACGGTCTCCCCACAACACAGGCGAACTC                        | golden gate 1      |
| gg_2_fwd           | GGCTACGGTCTCCGTGGCAGATGCTGTCATAAAAAAC                   | golden gate 2      |
| gg_2_rev           | GGCTACGGTCTCCTCTCCTACAACCTTCGGTAG                       | golden gate 2      |
| gg_3_fwd           | GGCTACGGTCTCCGAGACATTATACTTAAACCAGC                     | golden gate 3      |
| gg_3_rev           | GGCTACGGTCTCCGCCATTTTTCTAAAACAC                         | golden gate 3      |
| gg_4_fwd           | GGCTACGGTCTCCTGGCATTCCCATCTGGTAAAG                      | golden gate 4      |
| gg_4_rev           | GGCTACGGTCTCCAAAGTAAGAATCAATTAAATTGTCATCTTCG            | golden gate 4      |
| gg_5_fwd           | GGCTACGGTCTCCCTTTGTAGTTAAGAGACACAC                      | golden gate 5      |
| Bsal del orf 1 rev | GGCTACGGTCTCGCCTATCAGACATTATGCAAAGTAT                   | golden gate 5      |
| Bsal del orf 1 fwd | GGCTACGGTCTCGTAGGGACCTTTATGACAAGTTGCA                   | golden gate 6      |
| gg_6_rev           | GGCTACGGTCTCGTAATGTGTTTAAATATTGACACAG                   | golden gate 6      |
| gg_7_fwd           | GGCTACGGTCTCGATTAACATTAGCTGTACCCTATAATATG               | golden gate 7      |
| Bsa del spike rev  | GGCTACGGTCTCGGTCCCTAGCAGCAATATCACCAAGGCA                | golden gate 7      |
| Bsa del spike fwd  | GGCTACGGTCTCGGGACCTCATTTGTGCACAAAAGT                    | golden gate 8      |
| gg_8_rev           | GGCTACGGTCTCCCGGGATGATGACATGGATG                        | golden gate 8      |
| gg_9_fwd           | GGCTACGGTCTCCCCCGTATGAAGGTCTGAG                         | golden gate 9      |
| gg_9_rev           | GGCTACGGTCTCGAAGCTATTAATAATCACATGGGGATAGCACTA           | golden gate 9      |
| link gg fwd        | GGCTACGGTCTCGGCTTCTTAGGAGAATGACAAAAAAA                  | golden gate linker |
| link gg rev        | GGCTACGGTCTCGGGGAAGGTATAAACCTTTAATACGGTTCACTAAACCAGCTCT | golden gate linker |
| gg_F132A_fwd       | GGCTACGGTCTCGTGGTGCTGACCCTATACATTCT                     | golden gate F132A  |
| gg_F1532A_rev      | GGCTACGGTCTCGACCAGCAATACCAGCTGATAATAATG                 | golden gate F132A  |



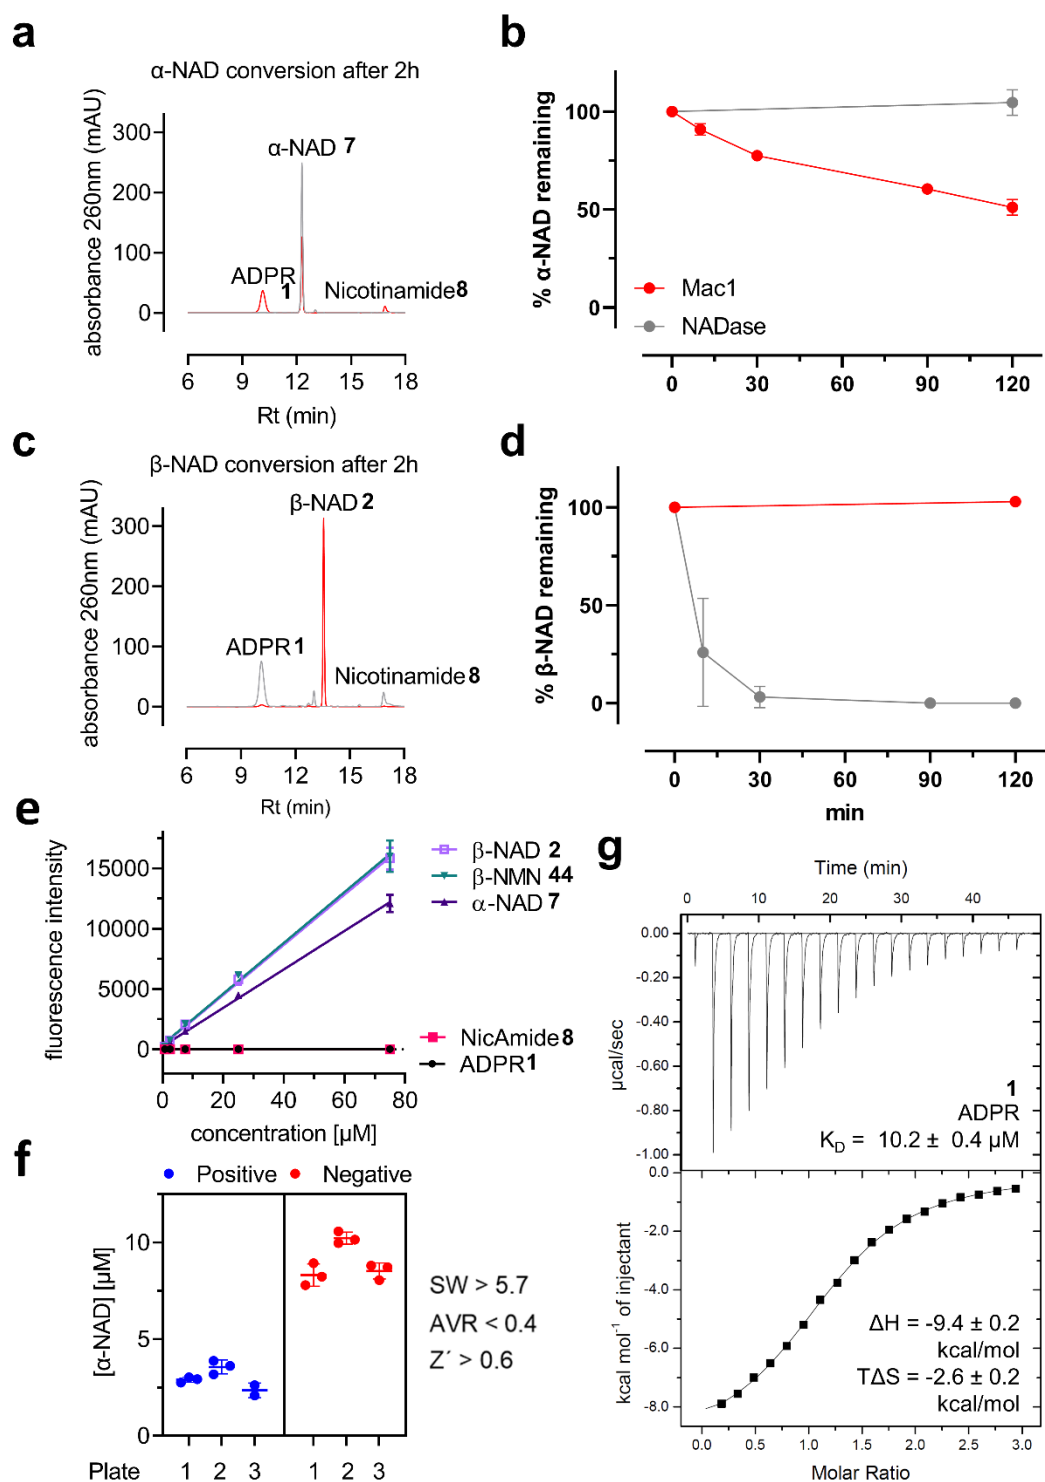

**Supplementary Fig. 1: α-NAD-based assays for Mac1 activity.**

(a, c) Representative HPLC chromatograms of the reaction products formed after 2 h incubation of 0.1 mM α-NAD 7 (a) or β-NAD 2 (c) with wildtype Mac1 (3 μM, red) or *Neurospora crassa* NADase (2 μg/ μl, grey). The experiments were repeated two more times. (b, d) Time course of the reactions of (a) and (c) respectively. (e) Test of the specificity and linearity of the microplate derivatisation reaction for different educts and the expected hydrolysis products respectively. Data are shown as mean ± SEM from 3 technical replicates. (f) Evaluation of the assay performance in 96-well format. Shown are the remaining α-NAD 7 levels after co-incubation with (positive control) or without Mac1 (negative control) of 3 independent assays (plate 1-3) to determine signal window (SW), assay variability ratio (AVR) and robustness (Z') according to Zhang and coworkers<sup>[1\*]</sup>. (g) Representative ITC data

of ADPR **1** binding by wildtype Mac1. Top graph shows a thermogram and the bottom graphs display the integrated binding heats fitted to a one-site binding model. The experiment was repeated two more times yielding  $K_D$ ,  $\Delta H$  and  $T\Delta S$  as mean  $\pm$  SD.

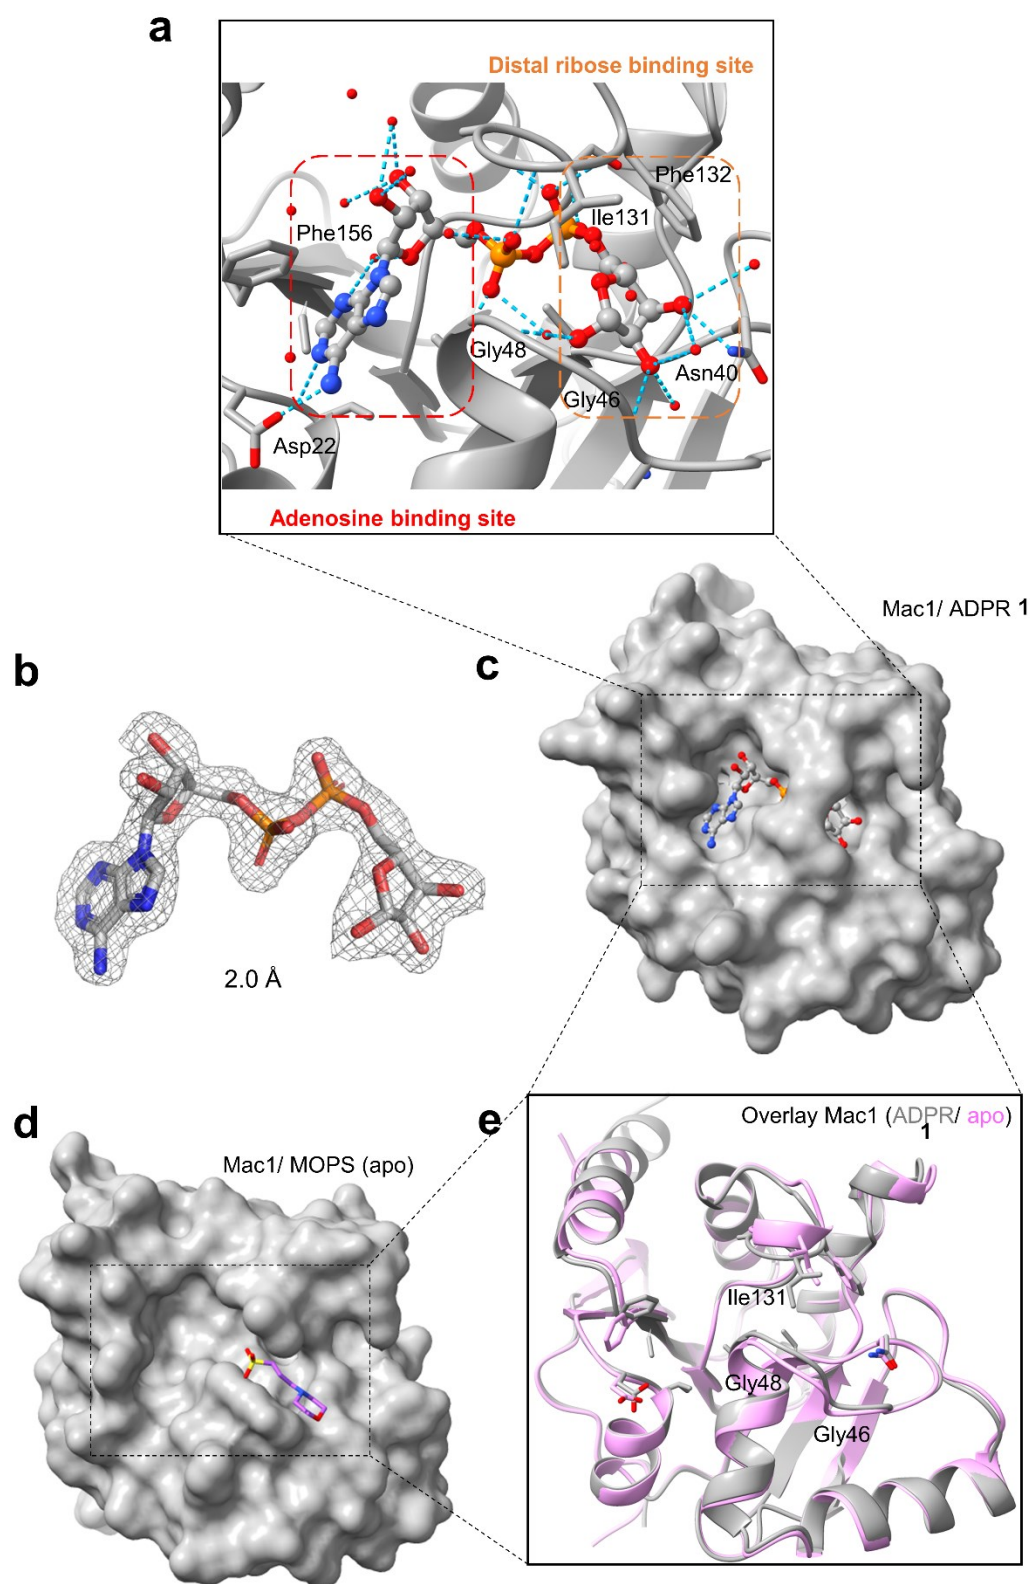

**Supplementary Fig. 2: Structure of Mac1 in the presence and absence of ADPR.**

**(a, c)** X-ray crystallography of ADPR 1 in complex with Mac1 (ADPR: PDB 8AZD) as cartoon (a) and surface presentation (c). Dashed blue lines indicate H-bond interactions. **(b)** Electron density ( $2mFo-DFc$ ,  $1\sigma$ ) for the ligand of a, c. **(d)** X-ray crystallography of MOPS in complex with Mac1 (apo: PDB 8AZC) as surface presentation. **(e)** Superimposition of the Mac1 conformations in the apo form (d) and in complex with ADPR (a, c).



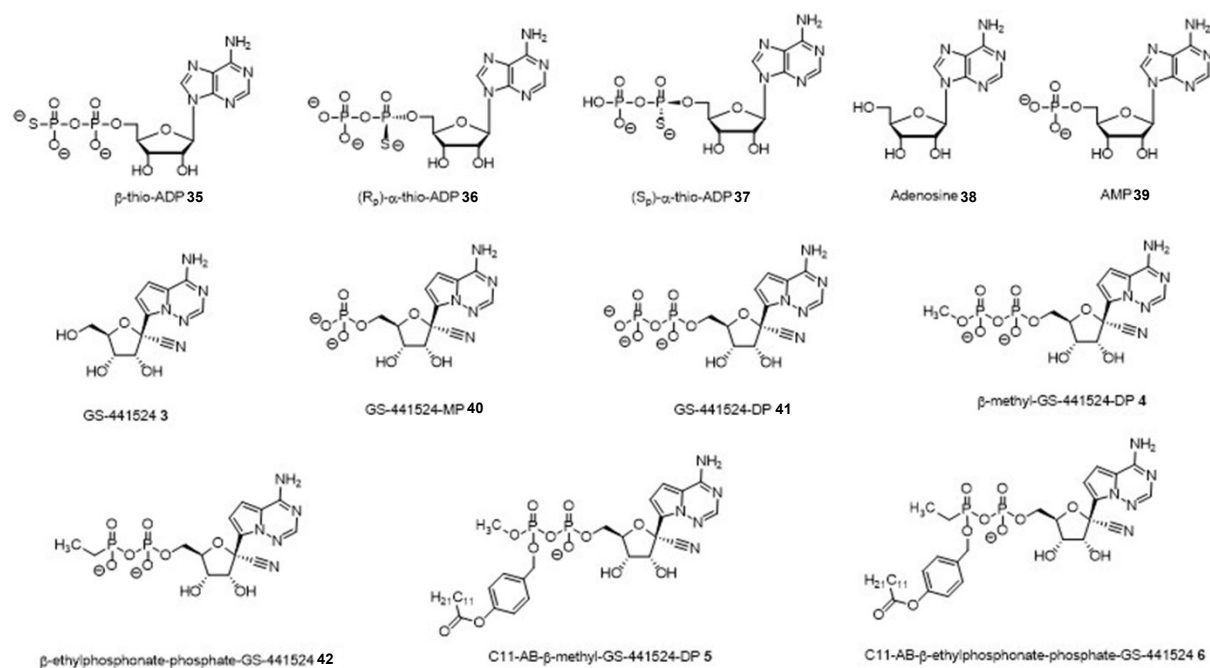

**Supplementary Fig. 4: Excerpt of ADP analogs and de-novo synthesised compounds in this study.**

Ribose: highly coordinated in active site

1' 2' 3'-OH → H: weak H-bonding/ inhibitor

Ribose → CH<sub>3</sub>: high affinity  
(entropically favored)

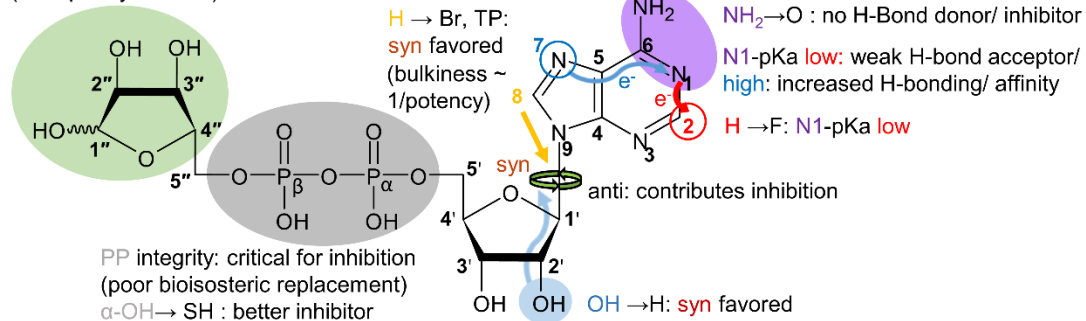

**Supplementary Fig. 5: Major SAR findings for ADPR binding towards Mac1.**

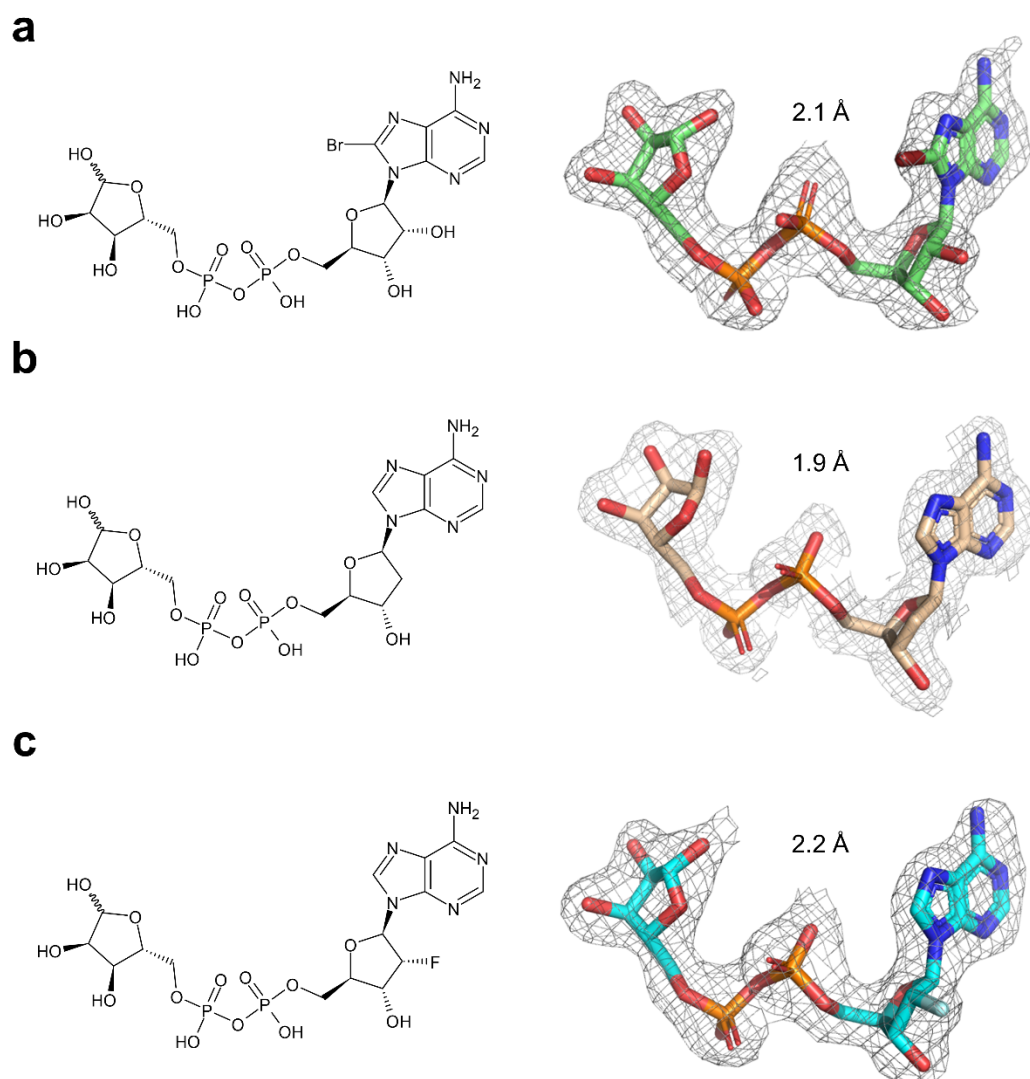

**Supplementary Fig. 6: Electron density of Adenosine-modified ADPR derivatives in the Mac1 cocrystals.**

Chemical structures and corresponding 2mFo-DFc maps at  $1\sigma$  for **(a)** 8-Br-ADPR **13** (PDB 8AZM), **(b)** 2'-deoxy-ADPR **16** (PDB 8AZI) and **(c)** 2'-F-2'-deoxy-ADPR **17** (PDB 8AZL).

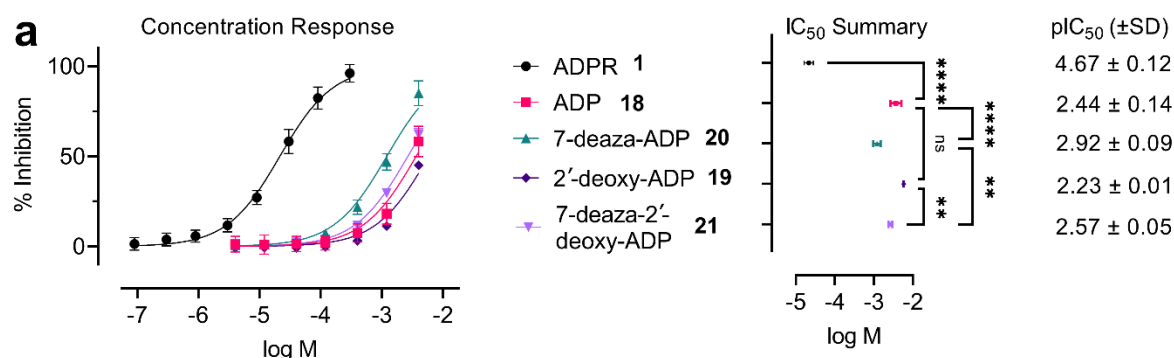

**Supplementary Fig. 7: Adenosine-modified ADP derivatives exhibit similar effects on Mac1 activity as their ADPR counterparts.**

**(a)** Concentration-response curves for Mac1 inhibition by Adenosine-modified ADP derivatives. Data were obtained using the microplate assay and the parameters of a sigmoidal model were fitted to the data. The derived pIC<sub>50</sub> values are shown to the right. Matched experiments using ADPR **1** (black) or ADP **18** (red) as inhibitor were included as control and are shown for comparison. Data are presented as mean ± SD and were tested by one-way ANOVA followed by pair-wise comparison using Šidák's correction. ns: not significant, \*\* p ≤ 0.01, \*\*\* p ≤ 0.001, \*\*\*\* p ≤ 0.0001. For all compounds except ADPR **1** and ADP **18**, data are from 3 independent experiments. Since the latter were always included as matched controls, data are from 9 (ADPR **1**) or 5 (ADP **18**) independent experiments respectively.



**a**

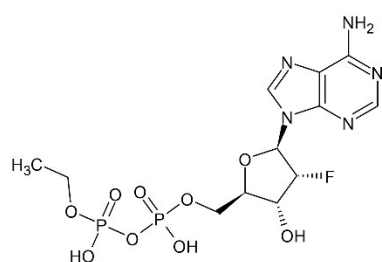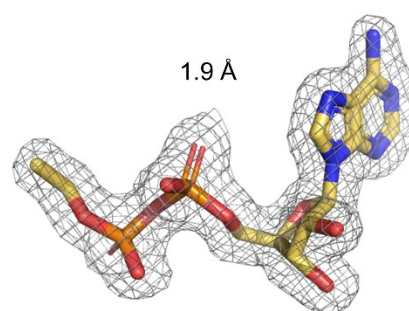

**b**

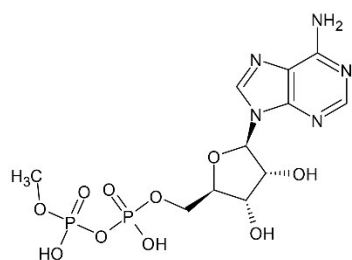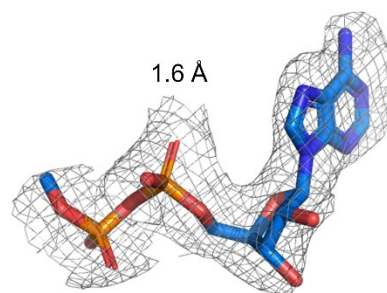

**Supplementary Fig. 8: Electron density of  $\beta$ -alkylated adenosine diphosphates in the Mac1 cocrystals.**

Chemical structures and corresponding 2mFo-DFc maps at 1 $\sigma$  for **(a)**  $\beta$ -ethyl-ADP **28** (PDB 8AZO) and **(b)**  $\beta$ -methyl-ADP **29** (PDB 8AZP).

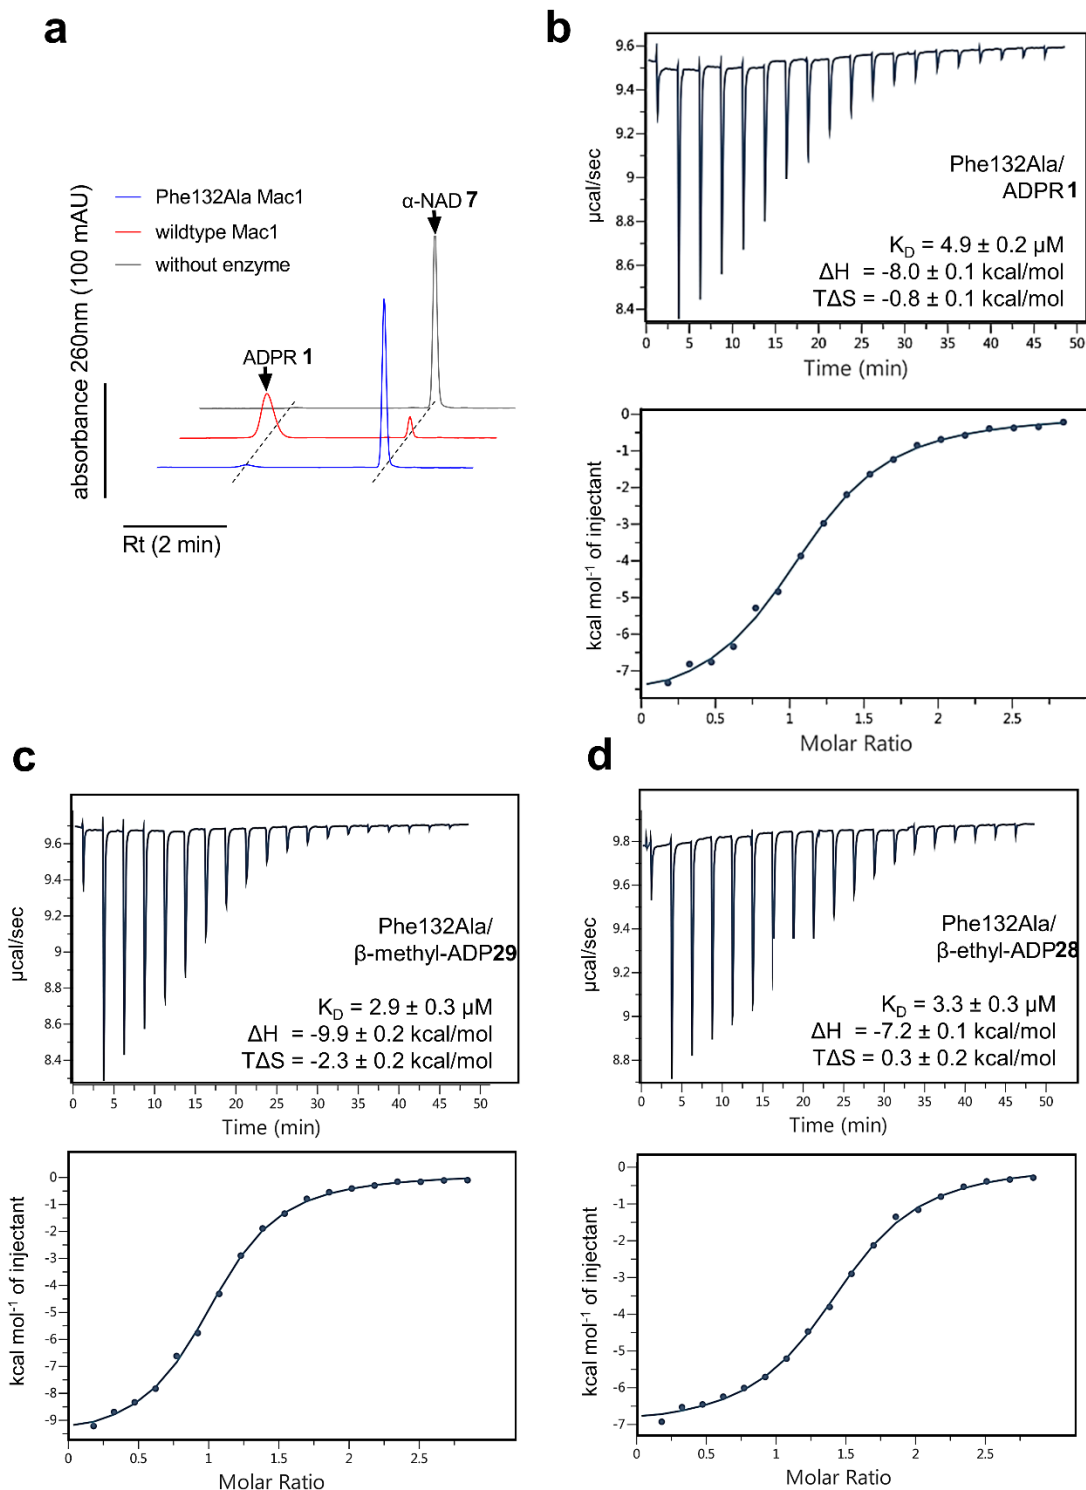

**Supplementary Fig. 9: Catalytically inactive Phe132Ala Mac1 binds ADPR,  $\beta$ -methyl- and  $\beta$ -ethyl-ADP with higher affinity than wildtype Mac1.**

**(a)** Representative HPLC chromatogram of the reaction products of 0.1 mM  $\alpha$ -NAD 7 after incubation with either wildtype Mac1 (red), Phe132Ala Mac1 (blue) or without enzyme (grey) for 20 hours. Dashed lines indicate retention times. The experiment was repeated two more times. **(b-d)** Representative ITC data for the binding of ADPR 1 (b),  $\beta$ -methyl-ADP 29 (c) and  $\beta$ -ethyl-ADP 28 (d) to Phe132Ala Mac1. The top graphs show thermograms and the bottom graphs show the integrated values of each titration point fitted to a one-site binding model. The experiments were repeated two more times yielding  $K_D$ ,  $\Delta H$  and  $T\Delta S$  as mean  $\pm$  SD.

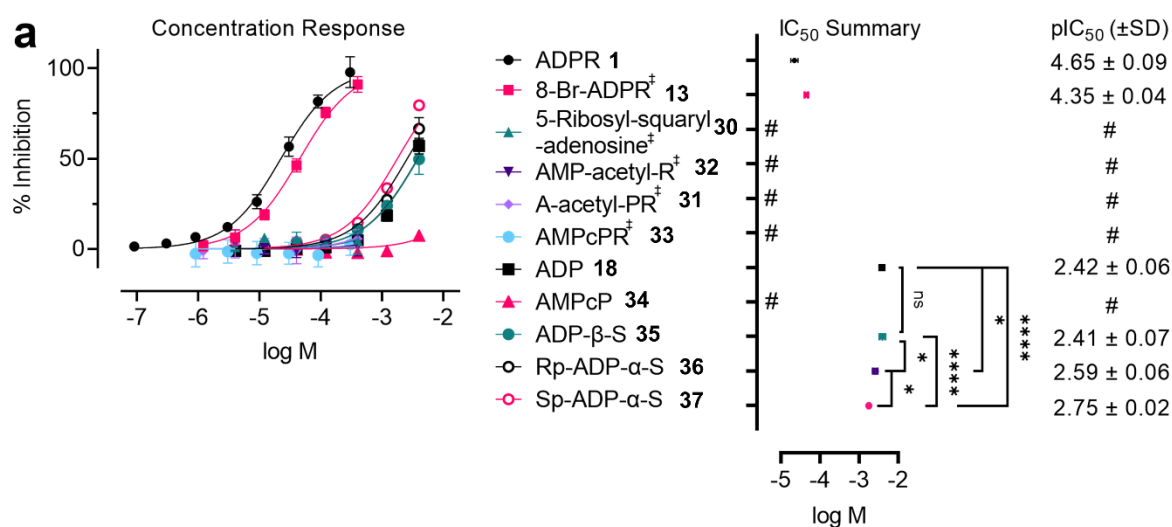

**Supplementary Fig. 10: While the pyrophosphate of ADPR can not be replaced by bioisosteres, phosphothioates of ADP show inhibition.**

(a) Concentration-response curves for Mac1 inhibition by ADPR derivatives with the pyrophosphate replaced by bioisosteres and ADP derivatives with modified diphosphate. Data were obtained using either the microplate assay or the HPLC assay (‡). The parameters of a sigmoidal model were fitted to the data and the derived pIC<sub>50</sub> values are shown to the right. In some cases the pIC<sub>50</sub> are outside the concentration range tested (#). Matched experiments using ADPR 1 or 8-Br-ADPR 13 as inhibitor were included as control and are shown for comparison. Data are presented as mean ± SD and were tested by one-way ANOVA followed by pair-wise comparison using Šídák's correction. ns: not significant, \*p ≤ 0.05, \*\*\*\* p ≤ 0.0001. For all compounds except ADPR 1 and 8-Br-ADPR 13, data are from 3 independent experiments. Since the latter were always included as matched controls, data are from 6 (ADPR 1) or 5 (8-Br-ADPR 13) independent experiments respectively.

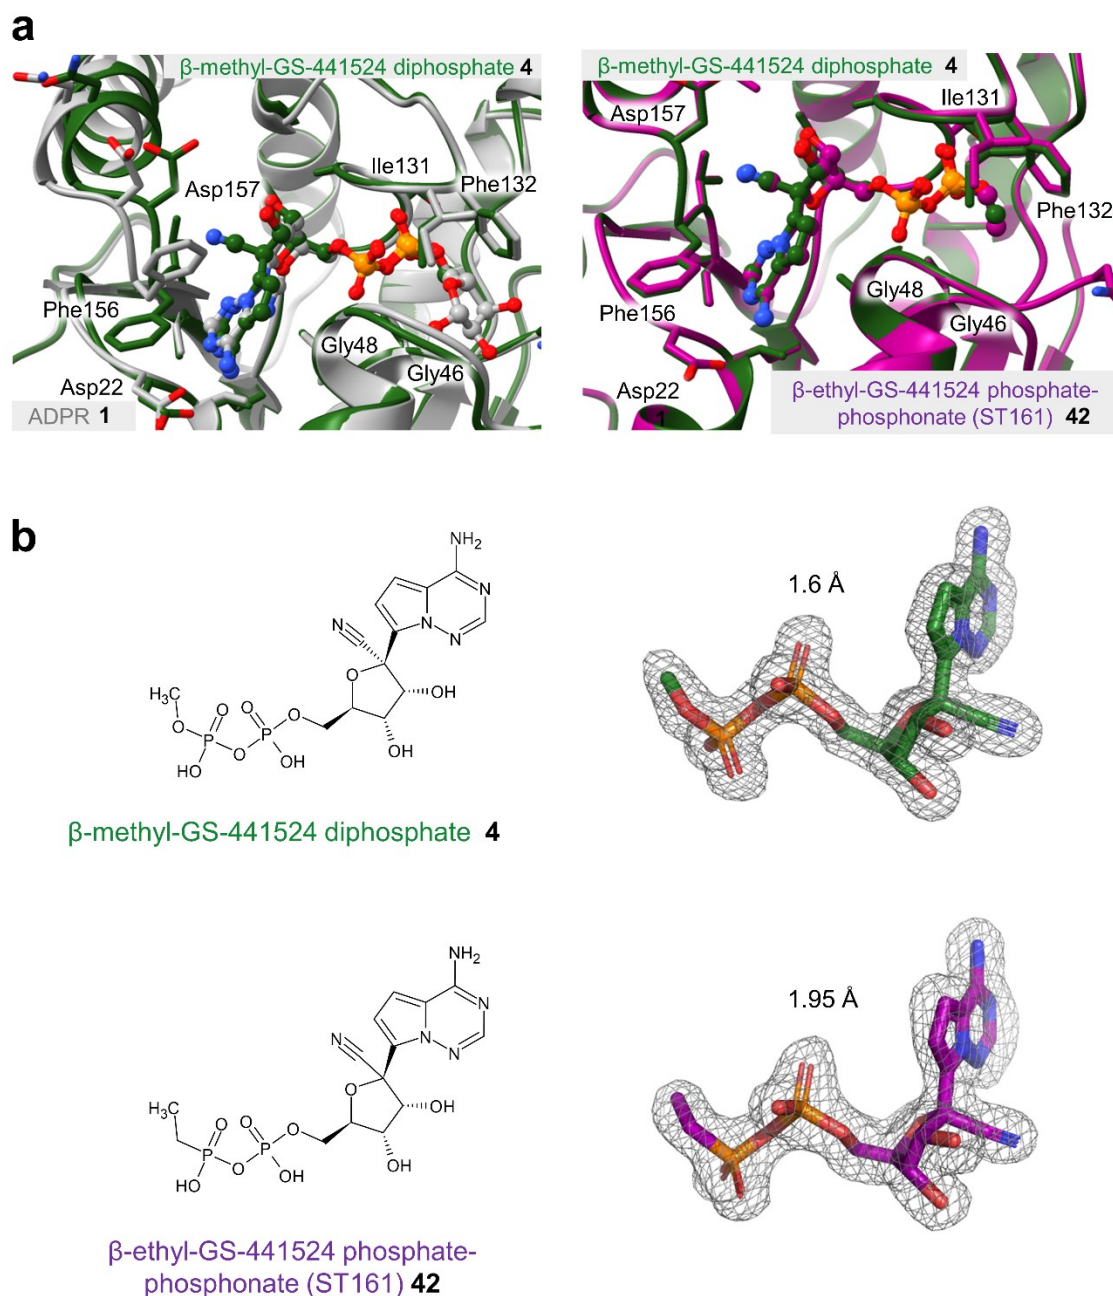

**Supplementary Fig. 11: Binding mode and electron density of Mac1 inhibitors.**

**(a)** Structure of the Mac1 complex with  $\beta$ -methyl-GS-441524-diphosphate **4** (green, PDB 9RHO) as superimposition with ADPR **1** (grey, PDB 8AZD) or ST161 **42** (magenta, PDB 9RHN). **(b)** Electron densities ( $2mF_o - DF_c$ ,  $1\sigma$ ) of the ligands of the Mac1 cocrystals with  $\beta$ -methyl-GS-441524-diphosphate **4** (green, PDB 9RHO) and ST161 **42** (magenta, PDB 9RHN).

**a**

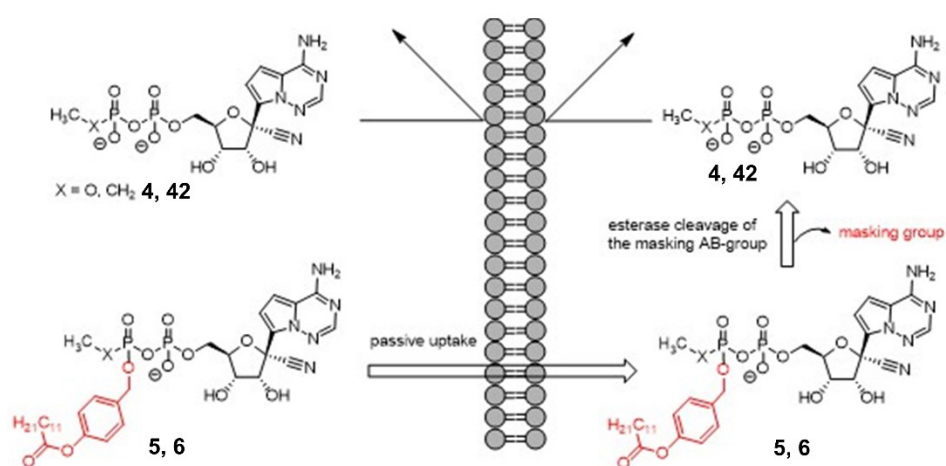

**b**

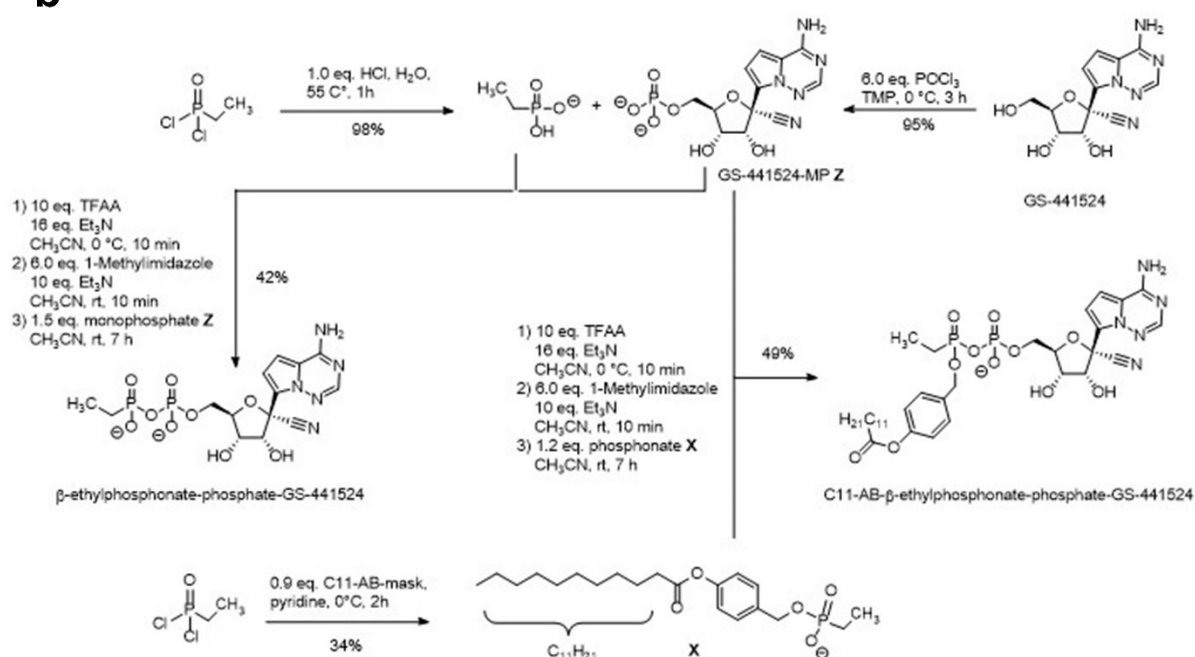

**Supplementary Fig. 12: The Mac1 prodrug concept.**

Scheme of the **(a)** intracellular delivery and entrapment of nucleotides as C<sub>11</sub>-AB-masked prodrugs as well as for the **(b)** synthesis of ST166 6.

**a**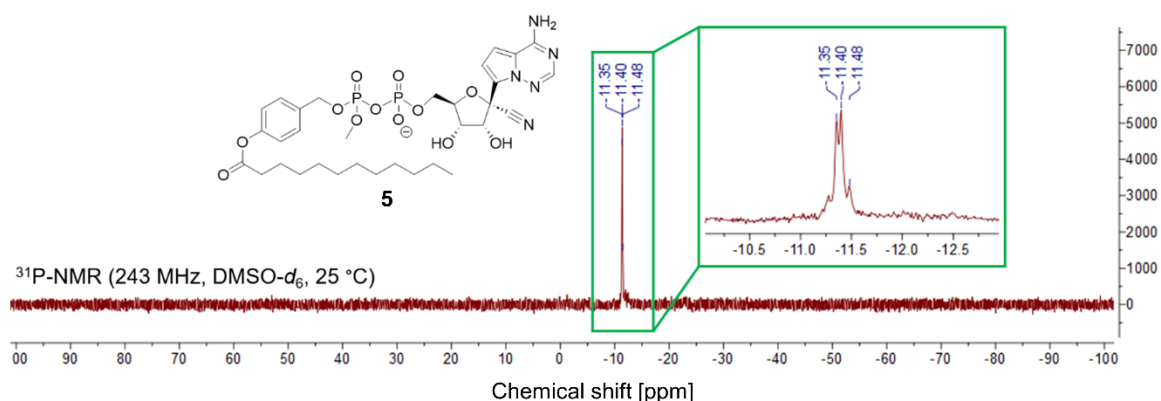**b**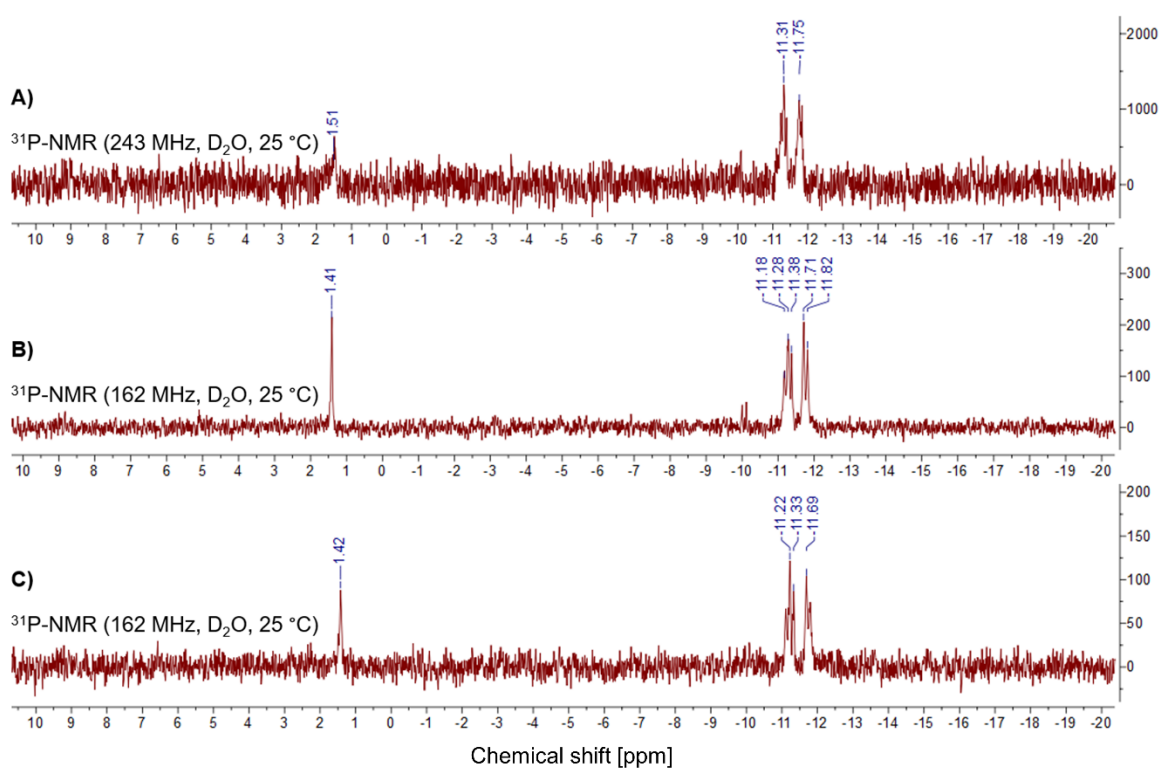

**Supplementary Fig. 13: Chemical stability of prodrug **5** during purification.**

**(a)**  $^{31}\text{P}$ -NMR spectra of prodrug **5** dissolved in deuterio-DMSO and measured at 243 MHz. No more than 5 minutes passed between sample preparation and measurement. The diphosphate signal is highlighted in green. **(b)**  $^{31}\text{P}$ -NMR spectra of prodrug **5** after purification by automated reversed phase chromatography on RP-18 silica gel. A) Spectrum after purification of the isolated prodrug **5** for two times. B) Spectrum after purification of the isolated prodrug **5** for three times. C) Spectrum after purification of the isolated prodrug **5** for four times. All spectra were measured in deuterio-water and at 243 MHz or 162 MHz. At least 30 minutes elapsed between sample preparation and measurement of diphosphate **5**.

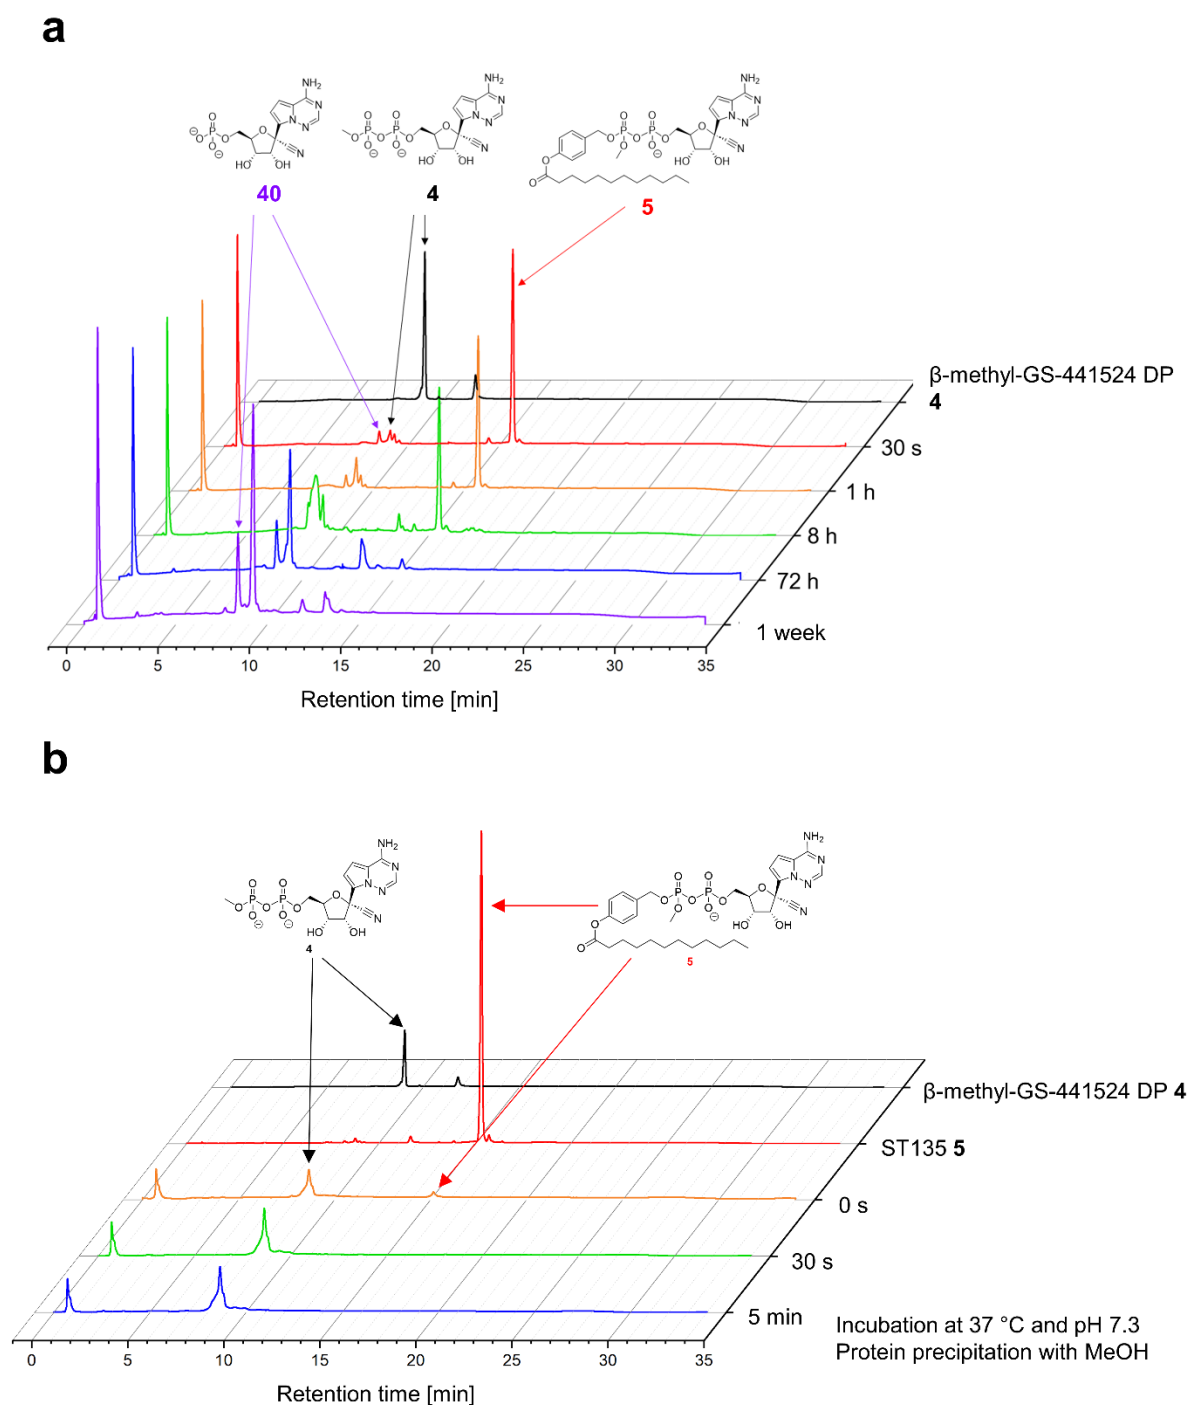

**Supplementary Fig. 14: Chemical stability and PLE digest of compound 4 and prodrug 5.**

**(a)** Representative HPLC chromatograms of the PBS hydrolysis study with Prodrug **5**. Hydrolysis solution was incubated with PBS at 37°C and pH 7.3. After indicated times (30s, 1 h, 8 h, 72 h, 1 week) aliquots were taken and analysed via HPLC (n=3). **(b)** Representative HPLC chromatograms of the PLE hydrolysis study with Prodrug **5**. Hydrolysis solution was incubated with PLE at 37°C and pH 7.3. After indicated times (0s, 30 s, 5 min) aliquots were taken and analysed via HPLC (n=3).



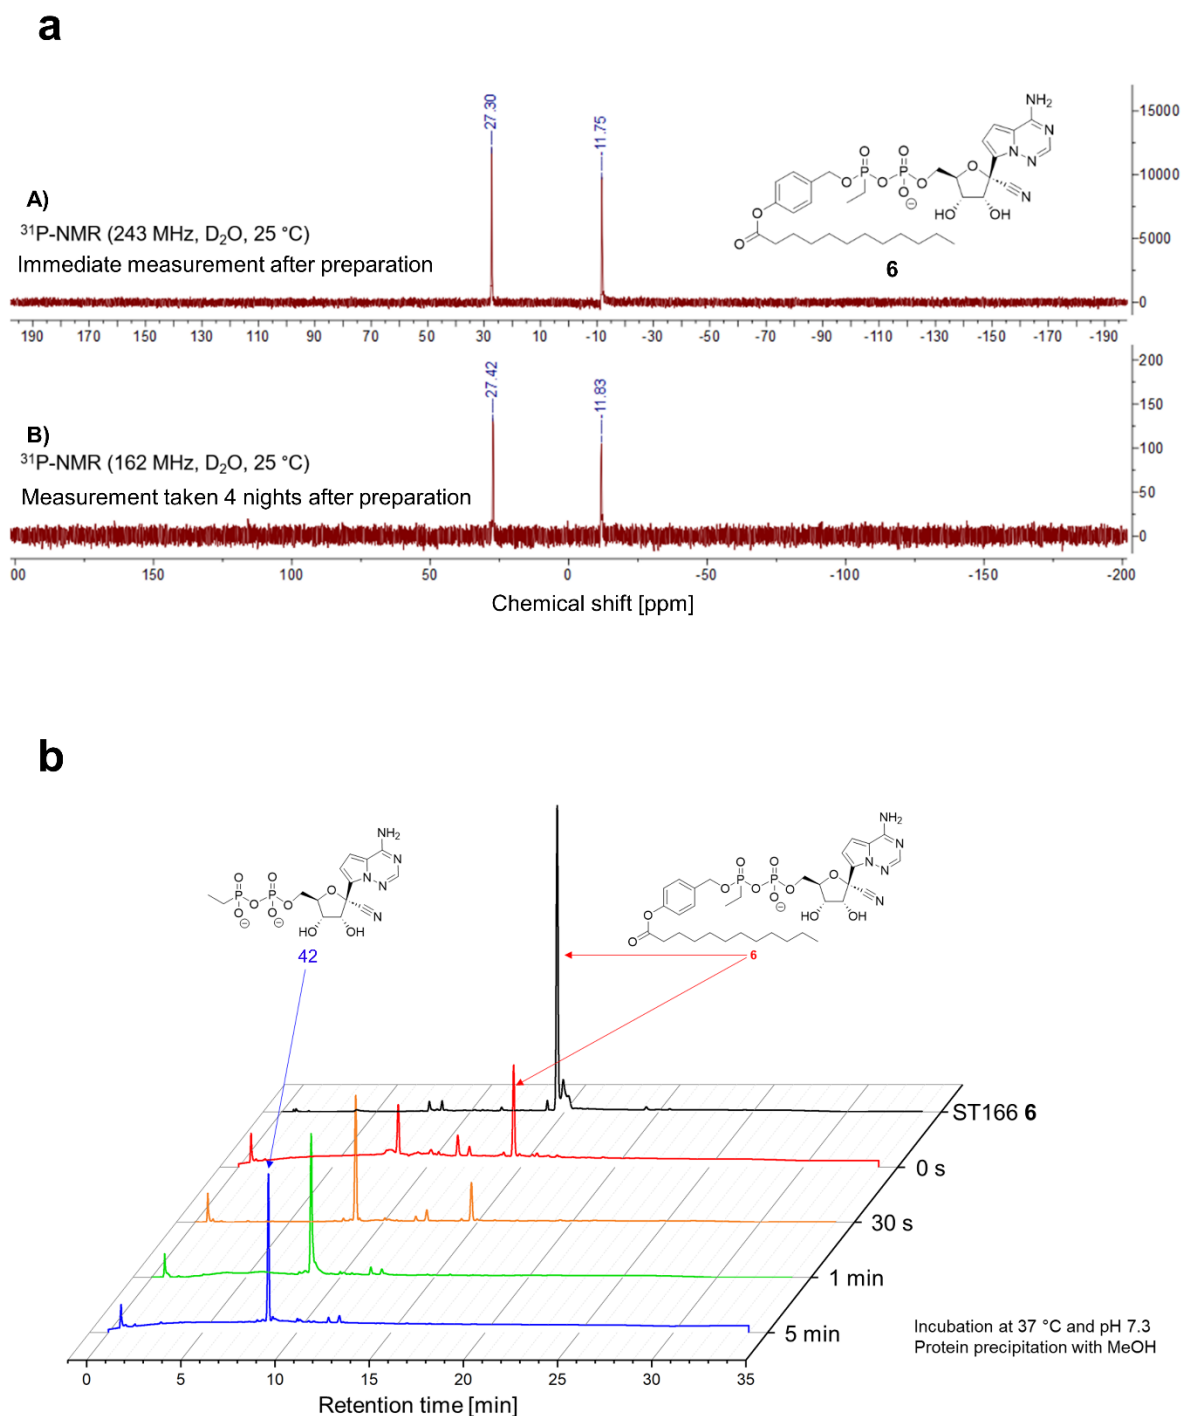

**Supplementary Fig. 15: Prodrug **6** is chemically stable.**

**(a)**  $^{31}\text{P}$ -NMR spectra of prodrug **6**. A) Spectrum measurement directly after sample preparation.  $^{31}\text{P}$ -NMR spectrum was measured in deuterio-water and at 243 MHz. B) Spectrum measurement after 4 nights following sample preparation.  $^{31}\text{P}$ -NMR spectrum was measured in deuterio-water and at 162 MHz. **(b)** Representative HPLC chromatograms of the PLE hydrolysis study with Prodrug **6**. Hydrolysis solution was incubated with PLE at 37°C and pH 7.3. After indicated times (0s, 30 s, 1 min, 5 min) aliquots were taken and analyzed via HPLC (n=3).



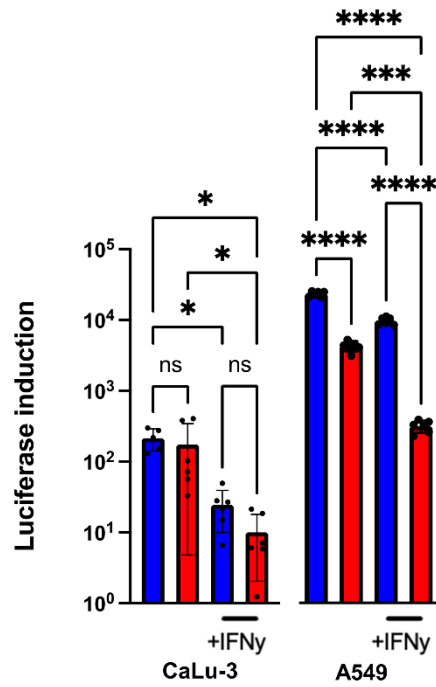

**Supplementary Fig. 16: Luciferase activity in cells infected with recombinant wildtype SARS-CoV-2 or the Mac1-inactive mutant with or without IFN- $\gamma$  pretreatment.**

**(a)** Transcriptional activity measured by the increase in luciferase (LUC) reporter activity of recombinant viruses rWT (blue bars) and rF132A (rF, red bars) 24 hpi on CaLu-3 cells (left) or A549-A/T cells (right) +/- stimulation by IFN- $\gamma$  (250 U) prior to infection. Individual datapoints from 6 independent experiments are presented, mean and SD are given. Results were tested by two-way ANOVA. ns: not significant, \* $p \leq 0.05$ , \*\*\*  $p \leq 0.001$ , \*\*\*\*  $p \leq 0.0001$ .

## References

[1\*] Zhang, JH., Chung, TD. & Oldenburg, KR. A Simple Statistical Parameter for Use in Evaluation and Validation of High Throughput Screening Assays. *J Biomol Screen.* **4**, 67-73 (1999).
